# Supplementary material for: Optimization of the fermentation media and growth conditions of Bacillus velezensis BHZ-29 using a Plackett–Burman design experiment combined with response surface methodology
Source: PubMed Central journal article supplement (PMC11071168; doi:10.3389/fmicb.2024.1355369), 2024-04-22
Supplement: Table_1.pdf [file Table_1.pdf]

Table S1 | Design and results of the experiments using steepest-ascent method

| Run numbers | X <sub>1</sub> (g/L) | X <sub>3</sub> (g/L) | X <sub>6</sub> (g/L) | Y <sub>1</sub>            | Y <sub>2</sub> |
|-------------|----------------------|----------------------|----------------------|---------------------------|----------------|
|             |                      |                      |                      | (10 <sup>10</sup> CFU/mL) | (mm/mL)        |
| 1           | 10                   | 10                   | 2.5                  | 0.73                      | 149.00         |
| 2           | 15                   | 15                   | 3                    | 1.32                      | 159.60         |
| 3           | 20                   | 20                   | 3.5                  | 1.43                      | 162.45         |
| 4           | 25                   | 25                   | 4                    | 0.81                      | 162.35         |
| 5           | 30                   | 30                   | 4.5                  | 0.62                      | 158.40         |
| 6           | 35                   | 35                   | 5                    | 0.77                      | 157.55         |
