# Supplementary material for: Optimization of the fermentation media and growth conditions of Bacillus velezensis BHZ-29 using a Plackett–Burman design experiment combined with response surface methodology
Source: PubMed Central journal article supplement (PMC11071168; doi:10.3389/fmicb.2024.1355369), 2024-04-22
Supplement: Table_2.pdf [file Table_2.pdf]

Table S2 | Analysis of variance for response surface quadratic model obtained from experimental results

| Source                        | Sum of squares | <i>df</i> | Mean square | <i>F</i> -value | <i>P</i> ( <i>P</i> > <i>F</i> ) |
|-------------------------------|----------------|-----------|-------------|-----------------|----------------------------------|
| Model                         | 536.30         | 9         | 59.59       | 12.29           | 0.0016                           |
| X <sub>1</sub>                | 101.75         | 1         | 101.75      | 20.99           | 0.0025                           |
| X <sub>3</sub>                | 46.42          | 1         | 46.42       | 9.58            | 0.0175                           |
| X <sub>6</sub>                | 4.80           | 1         | 4.80        | 0.99            | 0.3526                           |
| X <sub>1</sub> X <sub>3</sub> | 0.04           | 1         | 0.04        | 0.01            | 0.9302                           |
| X <sub>1</sub> X <sub>6</sub> | 9.33           | 1         | 9.33        | 1.93            | 0.2078                           |
| X <sub>3</sub> X <sub>6</sub> | 24.55          | 1         | 24.55       | 5.07            | 0.0591                           |
| X <sub>1</sub> <sup>2</sup>   | 118.61         | 1         | 118.61      | 24.47           | 0.0017                           |
| X <sub>3</sub> <sup>2</sup>   | 83.47          | 1         | 83.47       | 17.22           | 0.0043                           |
| X <sub>6</sub> <sup>2</sup>   | 110.81         | 1         | 110.81      | 22.86           | 0.0020                           |
| Residual                      | 33.93          | 7         | 4.85        |                 |                                  |
| Lack of fit                   | 6.28           | 3         | 2.09        | 0.30            | 0.8229                           |
| Pure error                    | 27.64          | 4         | 6.91        |                 |                                  |
| Core total                    | 570.23         | 16        |             |                 |                                  |
| <i>R</i> <sup>2</sup>         | 0.9405         |           |             |                 |                                  |

coefficient of determination (*R*<sup>2</sup>).
