# Supplementary material for: Optimization of the fermentation media and growth conditions of Bacillus velezensis BHZ-29 using a Plackett–Burman design experiment combined with response surface methodology
Source: PubMed Central journal article supplement (PMC11071168; doi:10.3389/fmicb.2024.1355369), 2024-04-22
Supplement: Table_3.pdf [file Table_3.pdf]

Table S3 | Experimental results of model validation regression

|                                                          | experimental |        |        |        |        | mean value | predicted |
|----------------------------------------------------------|--------------|--------|--------|--------|--------|------------|-----------|
|                                                          | 1            | 2      | 3      | 4      | 5      |            |           |
| numbers of viable bacteria<br>( $\times 10^{10}$ CFU/mL) | 2.03         | 2.30   | 2.02   | 2.51   | 1.99   | 2.17       | 1.91      |
| bacteriostatic titers<br>(mm/mL)                         | 156.40       | 154.73 | 152.13 | 153.87 | 148.53 | 153.13     | 151.58    |
