# Supplementary material for: Optimization of the fermentation media and growth conditions of Bacillus velezensis BHZ-29 using a Plackett–Burman design experiment combined with response surface methodology
Source: PubMed Central journal article supplement (PMC11071168; doi:10.3389/fmicb.2024.1355369), 2024-04-22
Supplement: Table_4.pdf [file Table_4.pdf]

Table S4 | Analysis of variance for orthogonal experimental design

| Source of variations | <i>df</i> | Sum of squares | Mean square | <i>F</i> -value | <i>P</i> ( <i>P</i> > <i>F</i> ) | Significant |
|----------------------|-----------|----------------|-------------|-----------------|----------------------------------|-------------|
| A                    | 2         | 3.628          | 1.814       | 13.021          | 0.010                            | *           |
| B                    | 2         | 0.076          | 0.038       | 0.273           | 0.772                            |             |
| C                    | 2         | 1.852          | 0.926       | 6.646           | 0.039                            | *           |
| D                    | 2         | 0.172          | 0.086       | 0.618           | 0.576                            |             |
| E                    | 2         | 0.492          | 0.246       | 1.767           | 0.263                            |             |
| F                    | 2         | 4.745          | 2.373       | 17.032          | 0.006                            | *           |
| Pure error           | 5         | 0.697          | 0.139       |                 |                                  |             |
| Core total           | 17        | 65.568         |             |                 |                                  |             |
