# Supplementary material for: Optimization of the fermentation media and growth conditions of Bacillus velezensis BHZ-29 using a Plackett–Burman design experiment combined with response surface methodology
Source: PubMed Central journal article supplement (PMC11071168; doi:10.3389/fmicb.2024.1355369), 2024-04-22
Supplement: Table_5.pdf [file Table_5.pdf]

Table S5 | Analysis of variance for experimental results based on Box-Behnken design

| Source                | Sum of squares | <i>df</i> | Mean square | <i>F</i> -value | <i>P</i> ( <i>P</i> > <i>F</i> ) | Significan |
|-----------------------|----------------|-----------|-------------|-----------------|----------------------------------|------------|
| Model                 | 17.220         | 9         | 1.910       | 6.000           | 0.0137                           | *          |
| A                     | 2.150          | 1         | 2.150       | 6.730           | 0.0357                           | *          |
| C                     | 0.580          | 1         | 0.580       | 1.820           | 0.2195                           |            |
| F                     | 0.043          | 1         | 0.043       | 0.130           | 0.7256                           |            |
| AC                    | 0.007          | 1         | 0.007       | 0.024           | 0.8823                           |            |
| AF                    | 0.065          | 1         | 0.065       | 0.200           | 0.6651                           |            |
| CF                    | 0.170          | 1         | 0.170       | 0.520           | 0.4946                           |            |
| A <sup>2</sup>        | 5.800          | 1         | 5.800       | 18.210          | 0.0037                           | *          |
| C <sup>2</sup>        | 2.390          | 1         | 2.390       | 7.490           | 0.0290                           | *          |
| F <sup>2</sup>        | 4.590          | 1         | 4.590       | 14.400          | 0.0068                           | *          |
| Residual              | 2.230          | 7         | 0.320       |                 |                                  |            |
| Lack of fit           | 0.970          | 3         | 0.320       | 1.030           | 0.4676                           |            |
| Pure error            | 1.260          | 4         | 0.310       |                 |                                  |            |
| Core total            | 19.450         | 16        |             |                 |                                  |            |
| <i>R</i> <sup>2</sup> | 0.8853         |           |             |                 |                                  |            |

coefficient of determination (*R*<sup>2</sup>).
