# Supplementary material for: Optimization of the fermentation media and growth conditions of Bacillus velezensis BHZ-29 using a Plackett–Burman design experiment combined with response surface methodology
Source: PubMed Central journal article supplement (PMC11071168; doi:10.3389/fmicb.2024.1355369), 2024-04-22
Supplement: Table_6.pdf [file Table_6.pdf]

Table S6 | Experimental results of model validation regression

|                                                          | experimental |        |        |        |        | mean value | predicted |
|----------------------------------------------------------|--------------|--------|--------|--------|--------|------------|-----------|
|                                                          | 1            | 2      | 3      | 4      | 5      |            |           |
| numbers of viable bacteria<br>( $\times 10^{10}$ CFU/mL) | 3.31         | 3.13   | 3.42   | 3.46   | 3.64   | 3.39       | 3.11      |
| bacteriostatic titers<br>(mm/mL)                         | 159.87       | 157.93 | 160.60 | 159.53 | 156.33 | 158.85     | 156.04    |
