# Supplementary material for: Optimization of the fermentation media and growth conditions of Bacillus velezensis BHZ-29 using a Plackett–Burman design experiment combined with response surface methodology
Source: PubMed Central journal article supplement (PMC11071168; doi:10.3389/fmicb.2024.1355369), 2024-04-22
Supplement: Table_7.pdf [file Table_7.pdf]

Table S7 | Effects of different treatments on biomass of cotton plants after growth for 30 days

| Treatment | Inoculation concentration(c fu/mL) | Plant height (cm)         | Root length (cm)       | The number of root hairs | The number of l eaves  |
|-----------|------------------------------------|---------------------------|------------------------|--------------------------|------------------------|
| BHZ-29    | $3 \times 10^8$                    | 21.24±2.36 <sup>a</sup>   | 7.24±0.73 <sup>a</sup> | 28.93±1.24 <sup>a</sup>  | 5.97±1.08 <sup>a</sup> |
|           | $3 \times 10^6$                    | 15.74±1.07 <sup>b</sup>   | 5.62±1.65 <sup>a</sup> | 17.45±1.35 <sup>b</sup>  | 3.89±0.32 <sup>c</sup> |
|           | $3 \times 10^5$                    | 16.32±0.35 <sup>abc</sup> | 6.22±2.31 <sup>a</sup> | 18.93±7.61 <sup>b</sup>  | 4.66±0.49 <sup>b</sup> |
| CK        | -                                  | 13.92±4.15 <sup>c</sup>   | 3.61±0.82 <sup>b</sup> | 17.22±2.38 <sup>c</sup>  | 3.42±0.65 <sup>c</sup> |
| VD        | -                                  | 8.24±1.49 <sup>d</sup>    | 3.43±0.61 <sup>b</sup> | 16.13±0.75 <sup>c</sup>  | 0.82±0.04 <sup>d</sup> |

Note: Values followed by different letters within a column are significantly different at  $P < 0.05$  level according to Duncan's new multiple range test.
